CORRECTION

## Correction: Evaluating the generalisability of region-naïve machine learning algorithms for the identification of epilepsy in low-resource settings

Ioana Duta, Symon M. Kariuki, Anthony K. Ngugi, Angelina Kakooza Mwesige, Honorati Masanja, Daniel M. Mwanga, Seth Owusu-Agyei, Ryan Wagner, J. Helen Cross, Josemir W. Sander, Charles R. Newton, Arjune Sen, Gabriel Davis Jones

There are errors in the authors' affiliations. The correct affiliations are listed below:

Ioana Duta<sup>1,2</sup>, Symon M. Kariuki<sup>3,4,5</sup>, Anthony K. Ngugi<sup>4,6</sup>, Angelina Kakooza Mwesige<sup>7</sup>, Honorati Masanja<sup>8</sup>, Daniel M. Mwanga<sup>9,10</sup>, Seth Owusu-Agyei<sup>11,12</sup>, Ryan Wagner<sup>13</sup>, J. Helen Cross<sup>14</sup>, Josemir W. Sander<sup>15,16,17</sup>, Charles R. Newton<sup>1,3,4,18</sup>, Arjune Sen<sup>1</sup>, Gabriel Davis Jones<sup>1,2,19</sup>

**1** Oxford Epilepsy Research Group, Nuffield Department of Clinical Neurosciences, John Radcliffe Hospital, Oxford, United Kingdom, **2** Oxford Digital Health Labs, Nuffield Department of Women's and Reproductive Health, The University of Oxford, John Radcliffe Hospital, Oxford, United Kingdom, **3** KEMRI/Wellcome Trust Research Programme, Centre for Geographic Medicine Research – Coast, Kilifi, Kenya, **4** Studies of Epidemiology of Epilepsy in Demographic Surveillance Systems (SEEDS) – INDEPTH Network, Accra, Ghana, **5** Department of Public Health, Pwani University, Kilifi, Kenya, **6** Department of Population Health, Aga Khan University, Nairobi, Kenya, **7** Department of Paediatrics and Child Health, Makerere University College of Health Sciences, Kampala, Uganda, **8** Ifakara Health Institute, Ifakara, Tanzania, **9** Data Synergy and Evaluations, African Population and Health Research Center, Nairobi, Kenya, **10** Department of Mathematics, University of Nairobi, Nairobi, Kenya, **11** Kintampo Health Research Centre, Kintampo, Ghana, **12** Institute of Health Research, University of Health and Allied Sciences, Ho, Ghana, **13** MRC/Wits Rural Public Health & Health Transitions Research Unit (Agincourt), School of Public Health, Faculty of Health Sciences, University of the Witwatersrand, Johannesburg, South Africa, **14** Developmental Neurosciences, University College London, UCL- Great Ormond Street Institute of Child Health, London, United Kingdom, **15** Department of Clinical & Experimental Epilepsy, UCL Queen Square Institute of Neurology, London, & Chalfont Centre for Epilepsy, Chalfont St Peter, United Kingdom, **16** Stichting Epilepsie Instellingen Nederland, Heemstede, Netherlands, **17** Department of Neurology, West China Hospital, Sichuan University, Chengdu, China, **18** Department of Psychiatry, University of Oxford, Oxford, United Kingdom, **19** The Alan Turing Institute, London, United Kingdom.

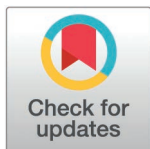

**OPEN ACCESS**

**Citation:** Duta I, Kariuki SM, Ngugi AK, Mwesige AK, Masanja H, Mwanga DM, et al. (2025) Correction: Evaluating the generalisability of region-naïve machine learning algorithms for the identification of epilepsy in low-resource settings. PLOS Digit Health 4(4): e0000841. <https://doi.org/10.1371/journal.pdig.0000841>

**Published:** April 17, 2025

**Copyright:** © 2025 Duta et al. This is an open access article distributed under the terms of the [Creative Commons Attribution License](https://creativecommons.org/licenses/by/4.0/), which permits unrestricted use, distribution, and reproduction in any medium, provided the original author and source are credited.

**Reference**

1. Duta I, Kariuki SM, Ngugi AK, Mwesige AK, Masanja H, Mwanga DM, et al. Evaluating the generalisability of region-naïve machine learning algorithms for the identification of epilepsy in low-resource settings. PLOS Digit Health. 2025;4(2): e0000491. <https://doi.org/10.1371/journal.pdig.0000491> PMID: [39937713](https://pubmed.ncbi.nlm.nih.gov/39937713/)
